# Supplementary material
Source: MDPI journal article supplement (https://www.mdpi.com/1999-4907/8/11/421)
Supplement: s1 [file s1]

# Supplementary Materials: Effects of reforestation and site preparation methods on early growth and survival of Scots pine (*Pinus sylvestris* L.) in south-eastern Poland

Marta Aleksandrowicz-Trzcińska, Stanisław Drozdowski, Zbigniew Wołczyk, Kamil Bielak and Henryk Żybura

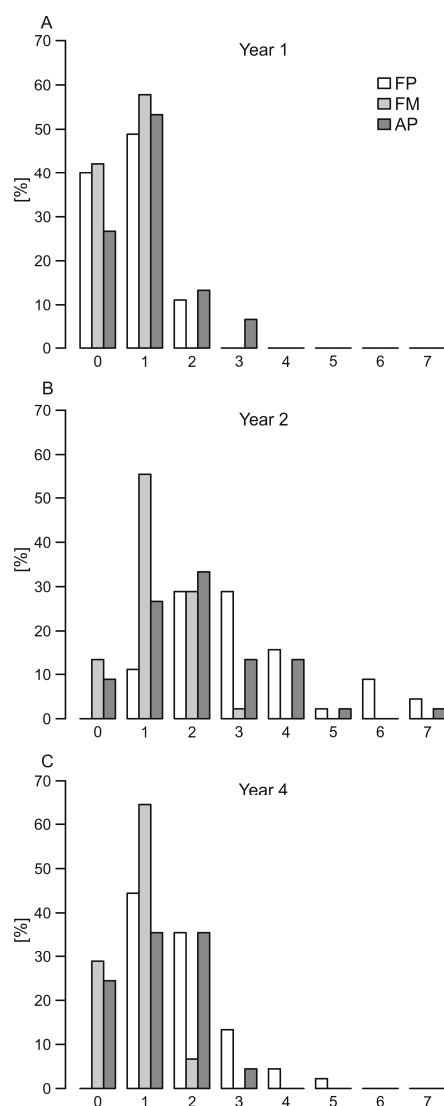

**Figure S1.** Evenness of seedling density (%) for Scots pine after natural regeneration in relation to mechanical site preparation methods (forest plough [FP]; forest mill [FM]; active plough [AP]) after the first year (A), the second year (B) and the fourth year (C). Seedling density classes: 0 = 'zero plots' (no seedlings); 1 = 1–4 seedlings; 2 = 5–8 seedlings; ... 7 = >25 seedlings.

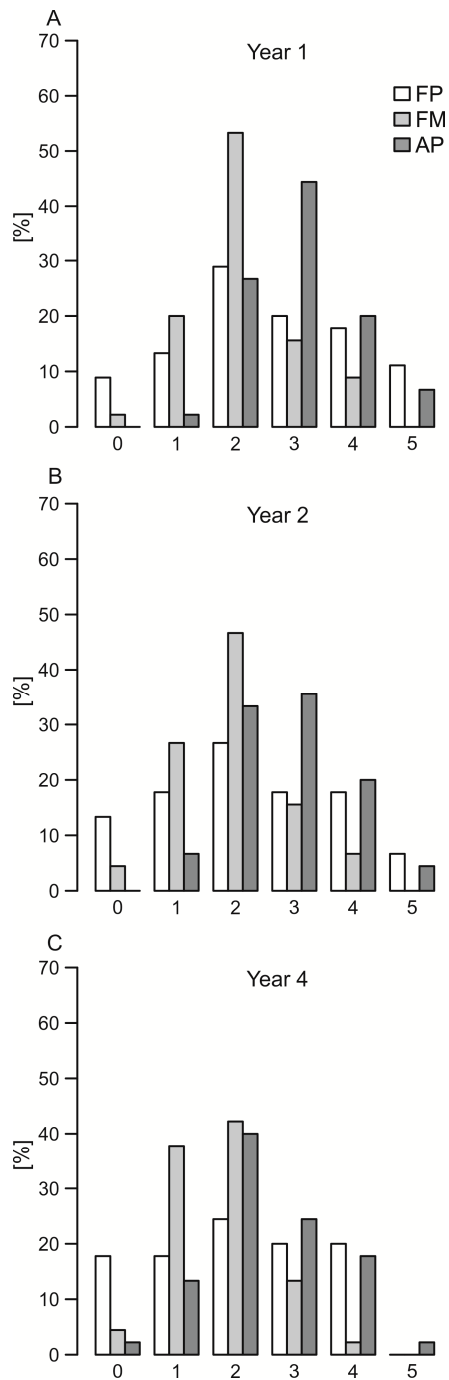

**Figure S2.** Evenness of seedling density (%) for Scots pine after direct seeding in relation to mechanical site preparation methods (forest plough [FP]; forest mill [FM]; active plough [AP]) after the first year (A), the second year (B) and the fourth year (C). Seedling density classes: 0 = 'zero plots' (no seedlings); 1 = 1–4 seedlings; 2 = 5–8 seedlings; ... 5 = 17–20 seedlings.

**Table S1.** Results of 2-way ANOVAs describing the statistical significance of the effect of reforestation and of mechanical site preparation (MSP) methods on height, root collar diameter and density (natural regeneration, excluding self-sown seedlings that germinated in the second year) of Scots pine seedlings after four growing seasons. Bold values indicate significant differences at the level  $p \leq 0.05$

| Variable             | Source of variation      | <i>df</i> | First season |                   | Second season |                   | Third season |                   | Fourth season |                   |
|----------------------|--------------------------|-----------|--------------|-------------------|---------------|-------------------|--------------|-------------------|---------------|-------------------|
|                      |                          |           | <i>F</i>     | <i>p</i>          | <i>F</i>      | <i>p</i>          | <i>F</i>     | <i>p</i>          | <i>F</i>      | <i>p</i>          |
| Seedling height      | Block                    | 8         | 1.23         | 0.2976            | 0.62          | 0.7586            | 1.30         | 0.2594            | 1.36          | 0.2330            |
|                      | Reforestation method (R) | 2         | 588.17       | <b>&lt;0.0001</b> | 285.65        | <b>&lt;0.0001</b> | 115.90       | <b>&lt;0.0001</b> | 97.15         | <b>&lt;0.0001</b> |
|                      | MSP method (M)           | 2         | 3.27         | <b>0.0446</b>     | 8.07          | <b>0.0008</b>     | 5.54         | <b>0.0061</b>     | 1.29          | 0.2818            |
|                      | R × M                    | 4         | 2.50         | 0.0511            | 2.02          | 0.1034            | 1.39         | 0.2479            | 1.25          | 0.2979            |
| Root collar diameter | Block                    | 8         | 1.97         | 0.0643            | 1.71          | 0.1131            | 1.24         | 0.2917            | 1.60          | 0.1436            |
|                      | Reforestation method (R) | 2         | 311.91       | <b>&lt;0.0001</b> | 20.47         | <b>&lt;0.0001</b> | 42.69        | <b>&lt;0.0001</b> | 52.85         | <b>&lt;0.0001</b> |
|                      | MSP method (M)           | 2         | 8.34         | <b>0.0006</b>     | 4.18          | <b>0.0198</b>     | 2.63         | 0.0804            | 0.63          | 0.5356            |
|                      | R × M                    | 4         | 0.90         | 0.4700            | 1.02          | 0.4013            | 0.64         | 0.6370            | 0.41          | 0.8008            |
| Seedling density     | Block                    | 8         | 2.35         | 0.0280            | 2.52          | 0.0190            | 2.69         | 0.0130            | 2.73          | 0.0118            |
|                      | Reforestation method (R) | 2         | 131.03       | <b>&lt;0.0001</b> | 109.08        | <b>&lt;0.0001</b> | 103.17       | <b>&lt;0.0001</b> | 88.68         | <b>&lt;0.0001</b> |
|                      | MSP method (M)           | 2         | 6.35         | <b>0.0031</b>     | 5.49          | <b>0.0063</b>     | 5.15         | <b>0.0084</b>     | 4.53          | <b>0.0144</b>     |
|                      | R × M                    | 4         | 2.09         | 0.0920            | 1.88          | 0.1245            | 1.91         | 0.1201            | 1.75          | 0.1507            |

**Table S2.** Regression equations describing the relationships between height increments and height and between root collar diameter increments and root collar diameter of Scots pine seedlings

| Year      | Function                               | $r$   | $R^2$ | $p$    |
|-----------|----------------------------------------|-------|-------|--------|
| 2008–2009 | $CAI_{rcd} = 2.366 + 0.413 \cdot rcd$  | 0.210 | 0.044 | <0.001 |
| 2008–2009 | $CAI_h = 5.289 + 0.737 \cdot h$        | 0.455 | 0.207 | <0.001 |
| 2009–2010 | $CAI_{rcd} = 1.657 + 1.104 \cdot rcd$  | 0.517 | 0.267 | <0.001 |
| 2009–2010 | $CAI_h = 13.174 + 0.705 \cdot h$       | 0.462 | 0.213 | <0.001 |
| 2010–2011 | $CAI_{rcd} = -0.845 + 0.439 \cdot rcd$ | 0.516 | 0.266 | <0.001 |
| 2010–2011 | $CAI_h = -1.129 + 0.516 \cdot h$       | 0.538 | 0.289 | <0.001 |

$CAI_{rcd}$  = current annual increment of root collar diameter;  $CAI_h$  = current annual increment of tree height;  $r$  = coefficient of correlation;  $R^2$  = coefficient of determination;  $p$  = probability.
